# Supplementary material
Source: PubMed Central journal article supplement (PMC6003242)

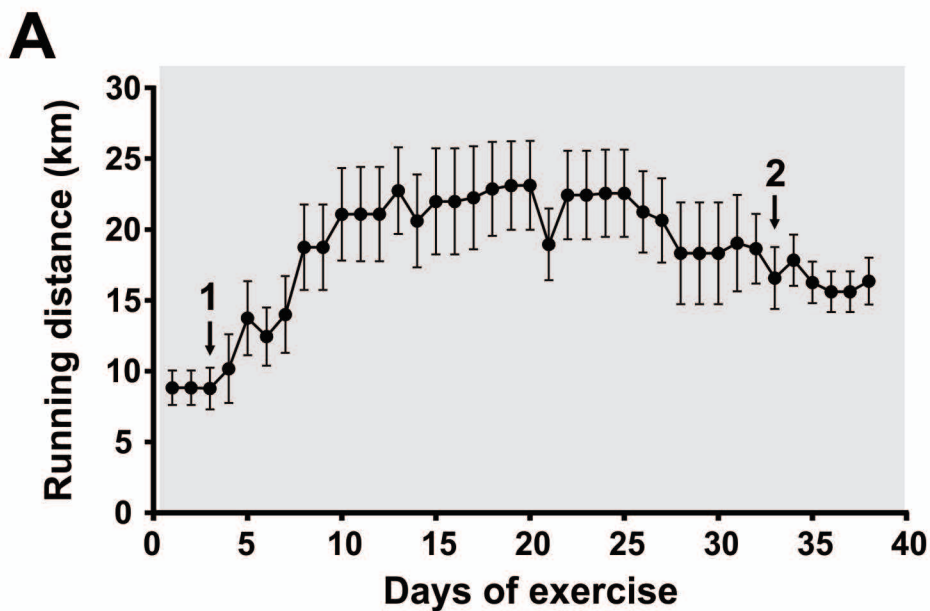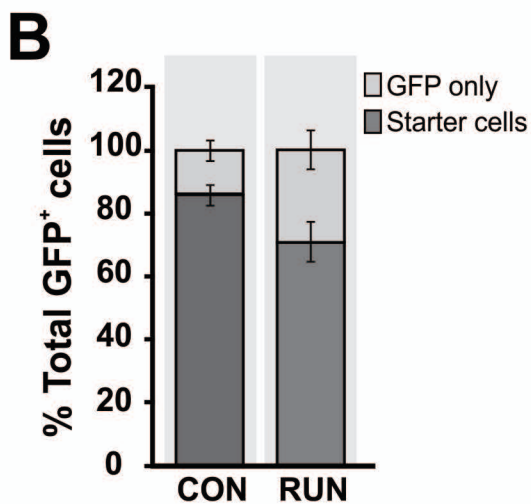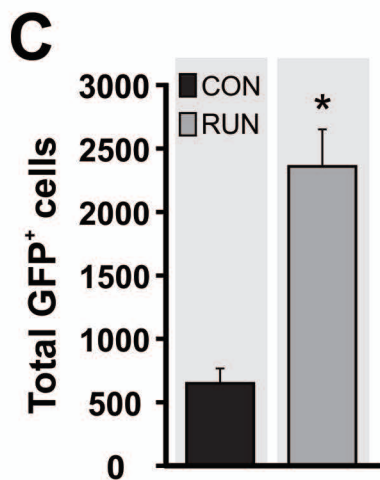

A

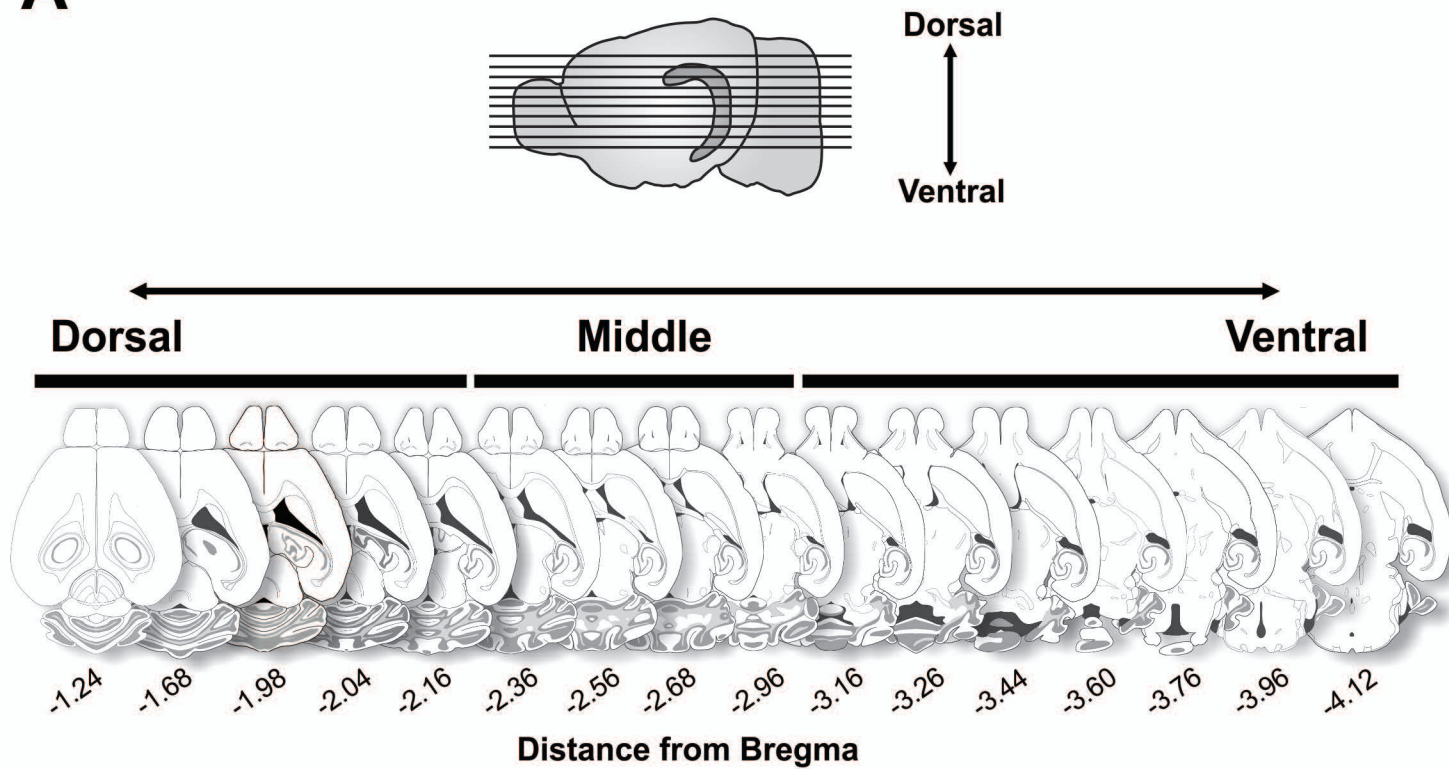

B

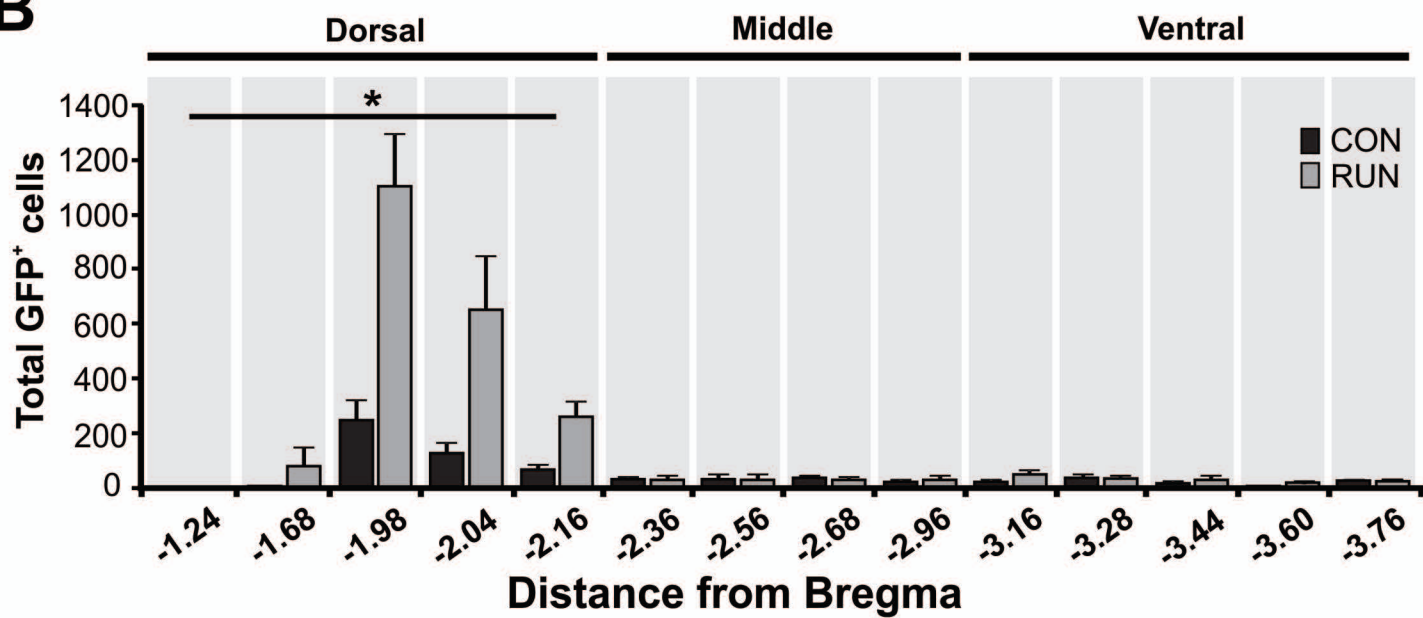

Fig. S3

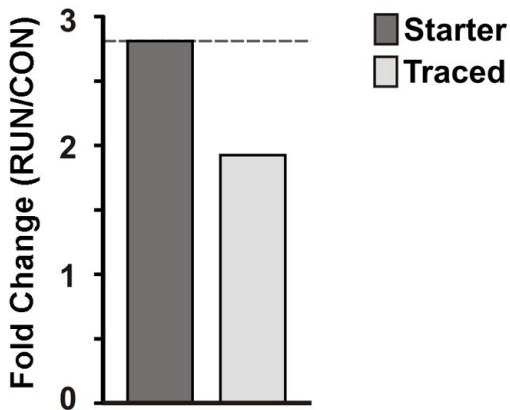

Fig. S4

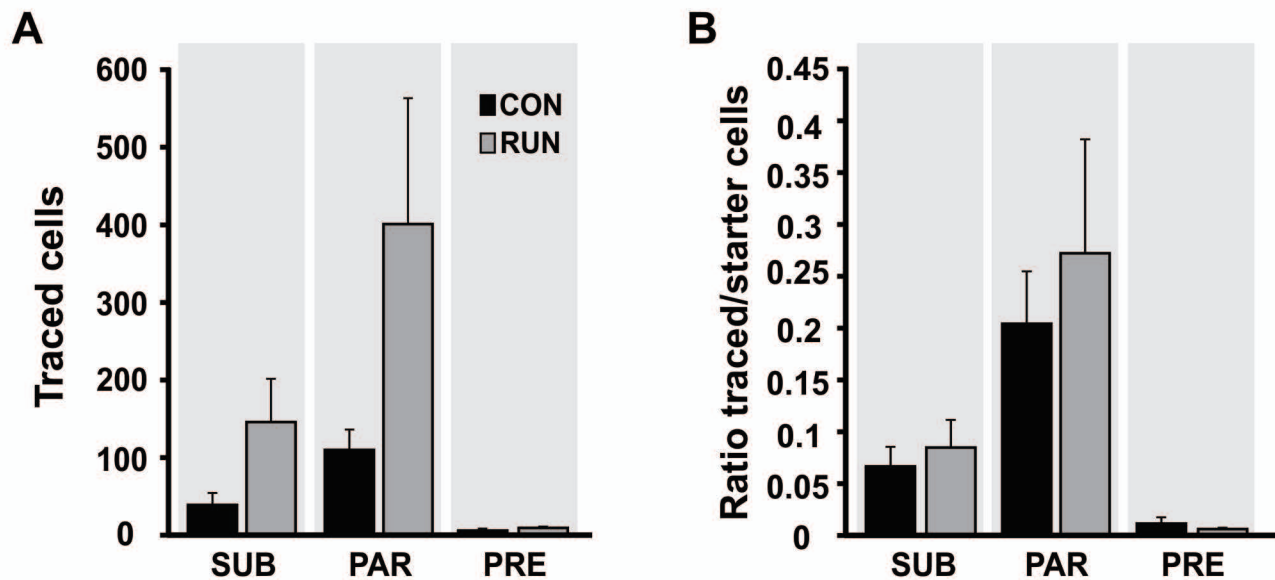

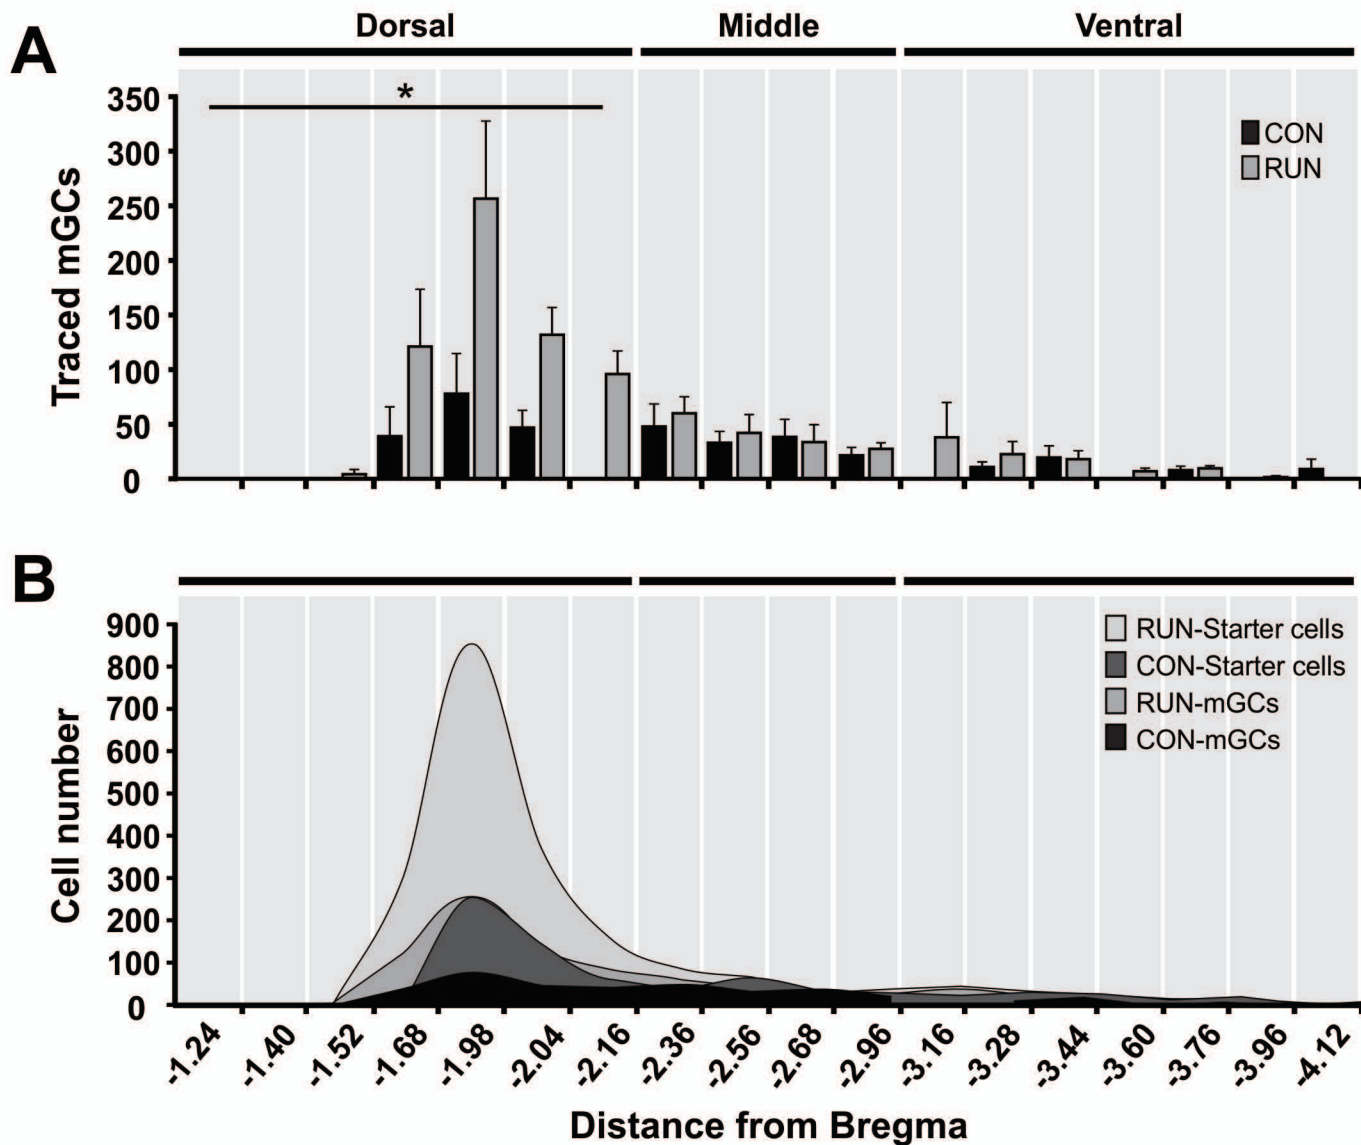

A

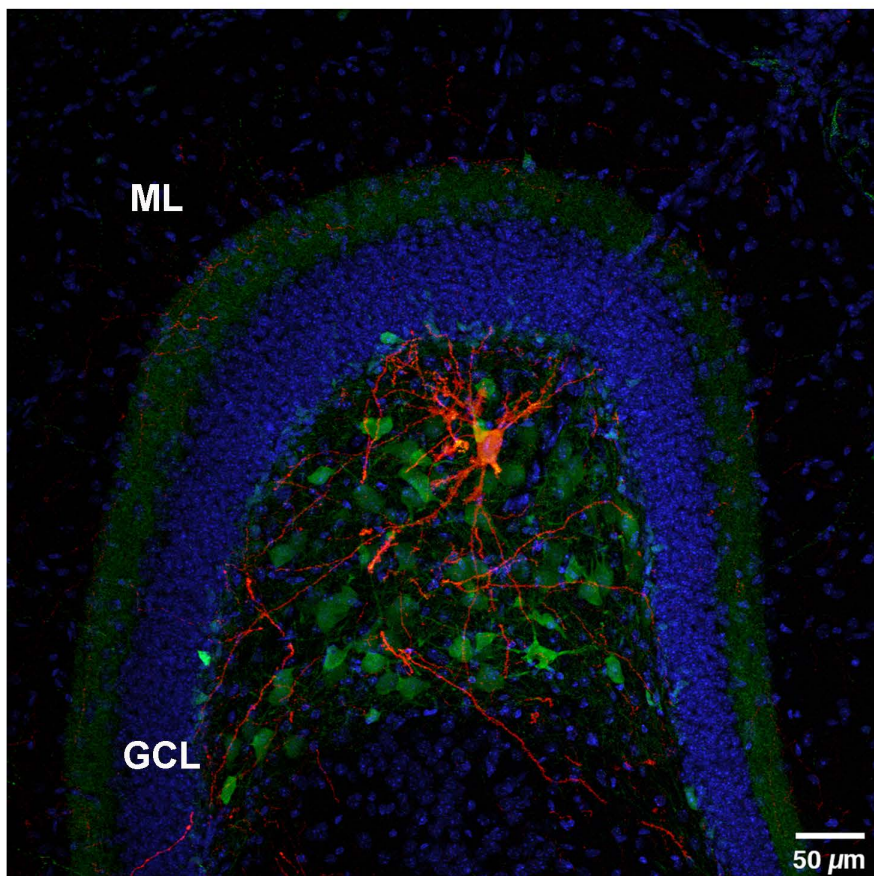

B

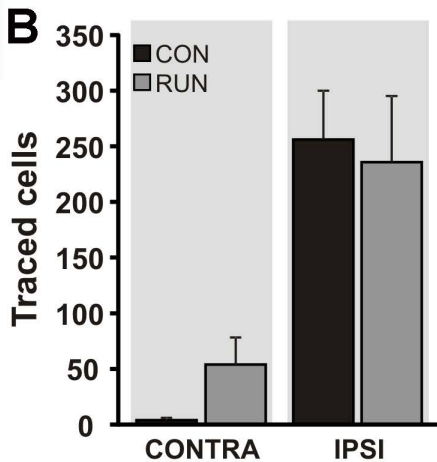

C

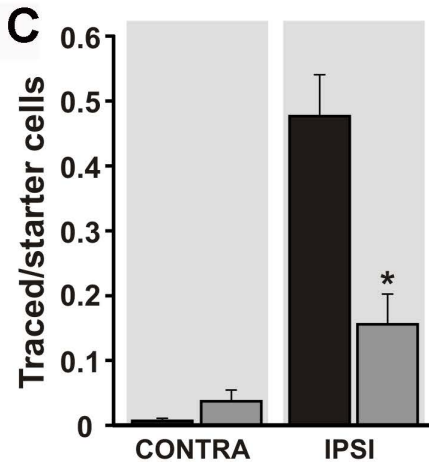

D

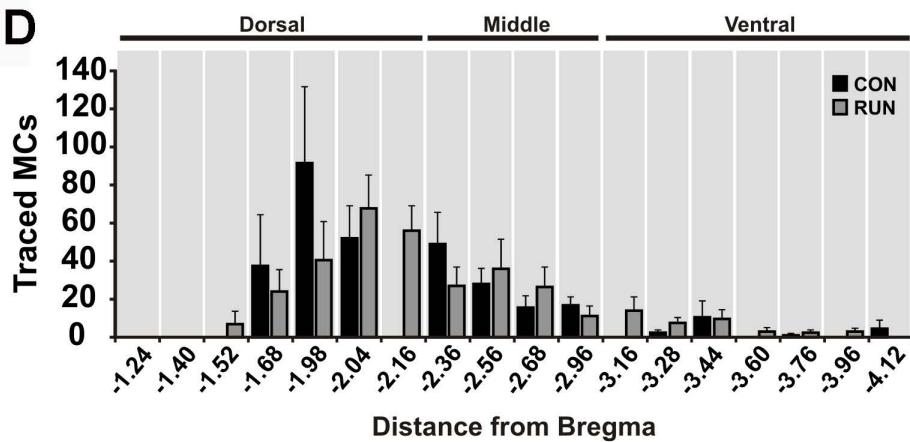

Fig. S7

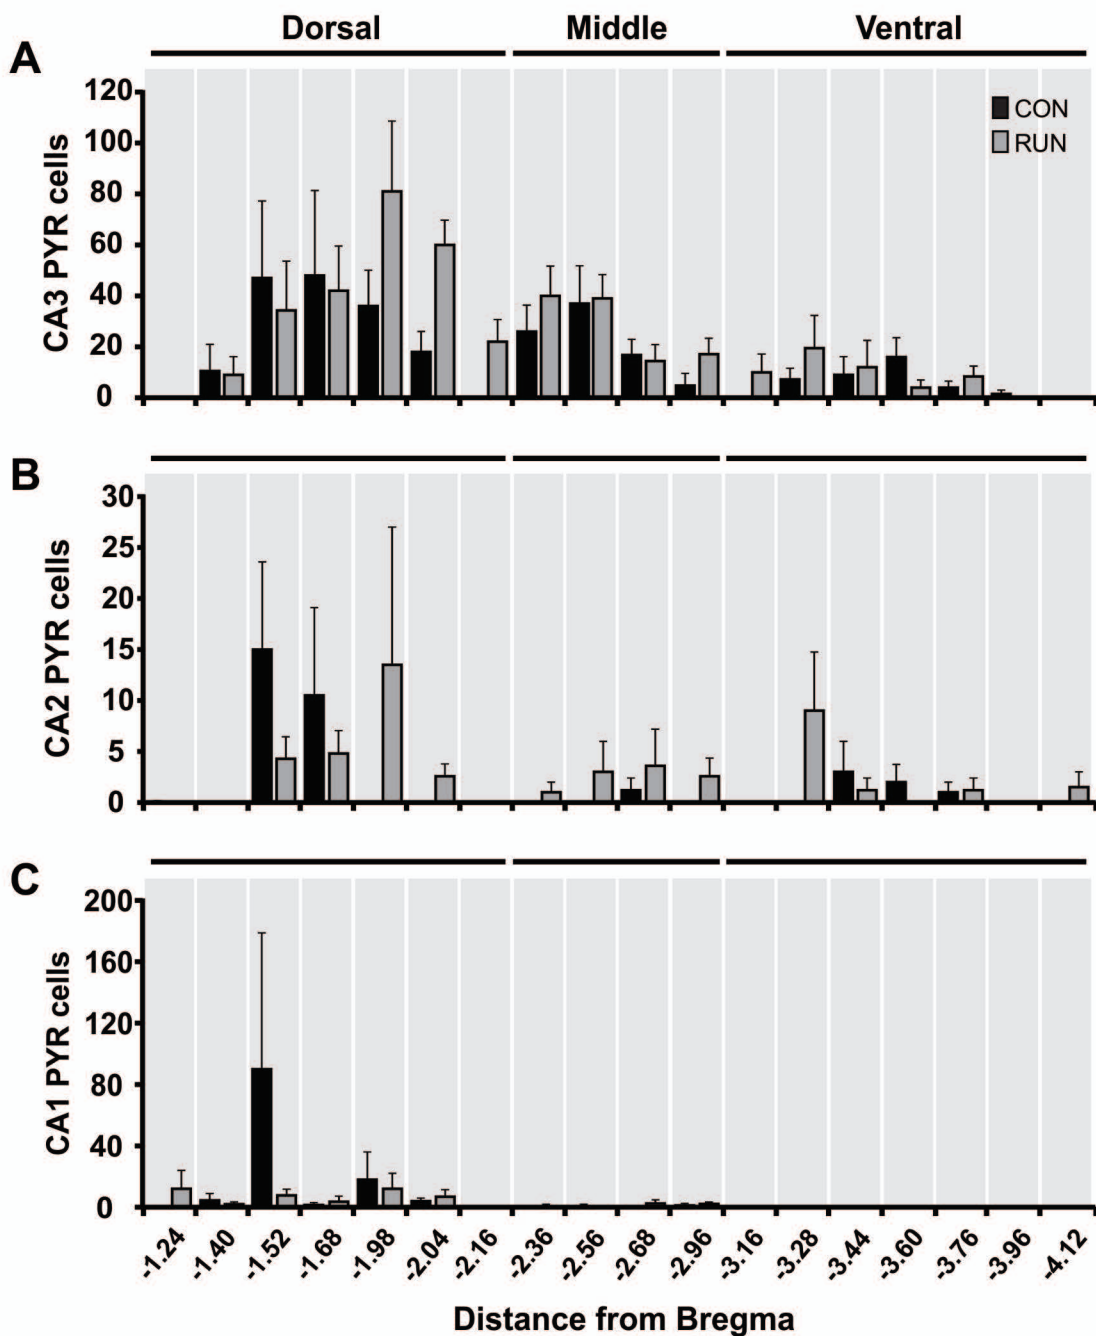

Fig. S8

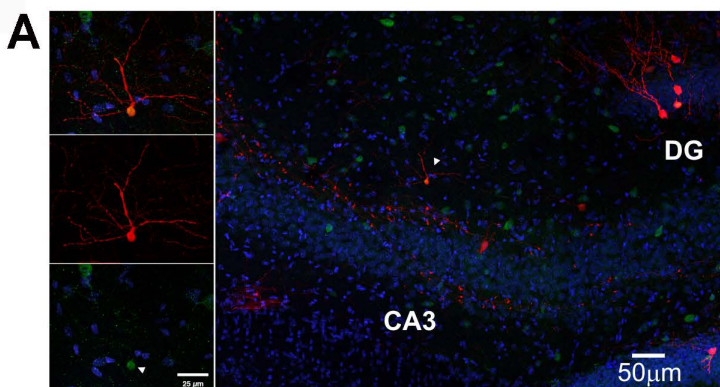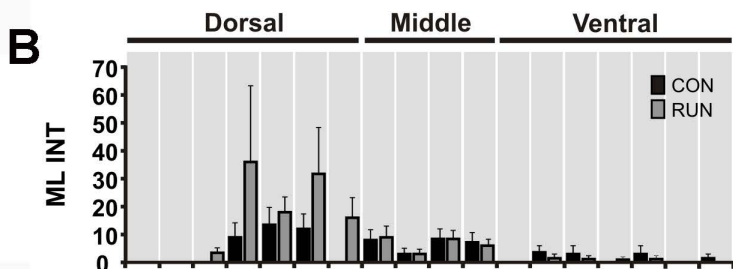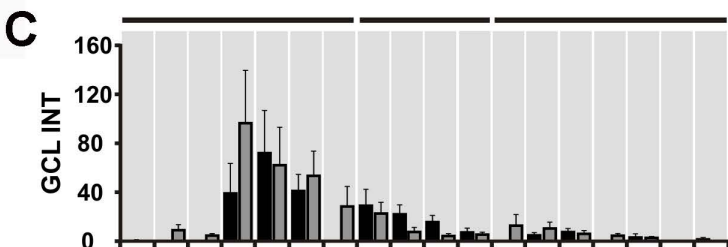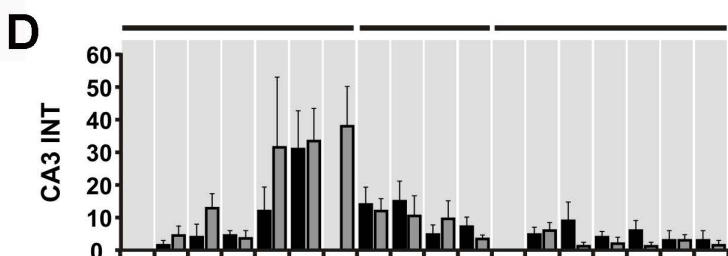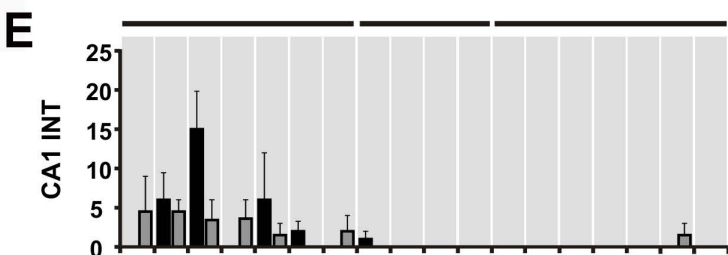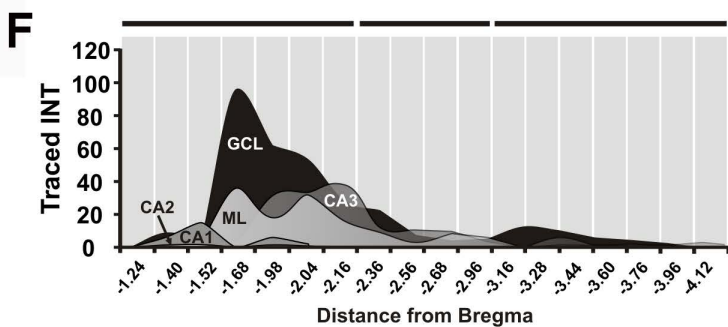



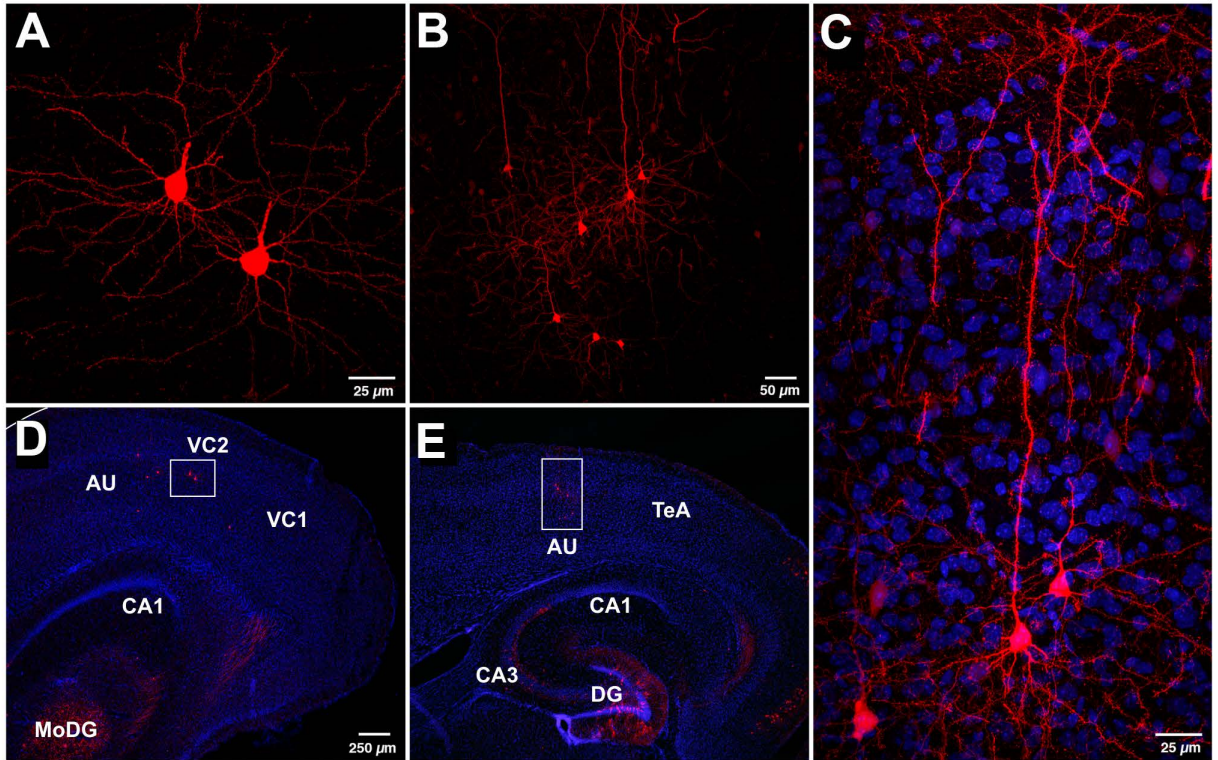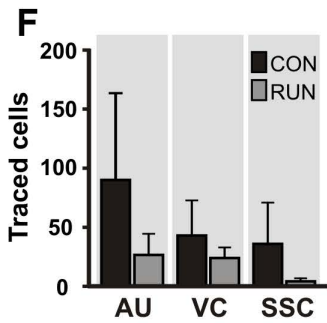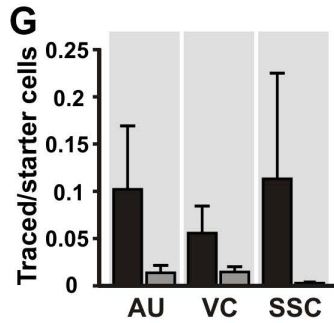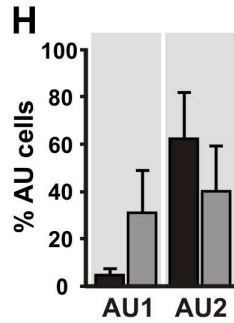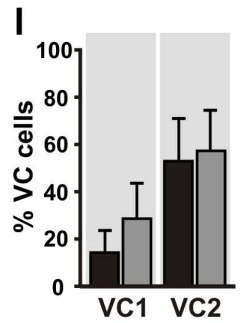

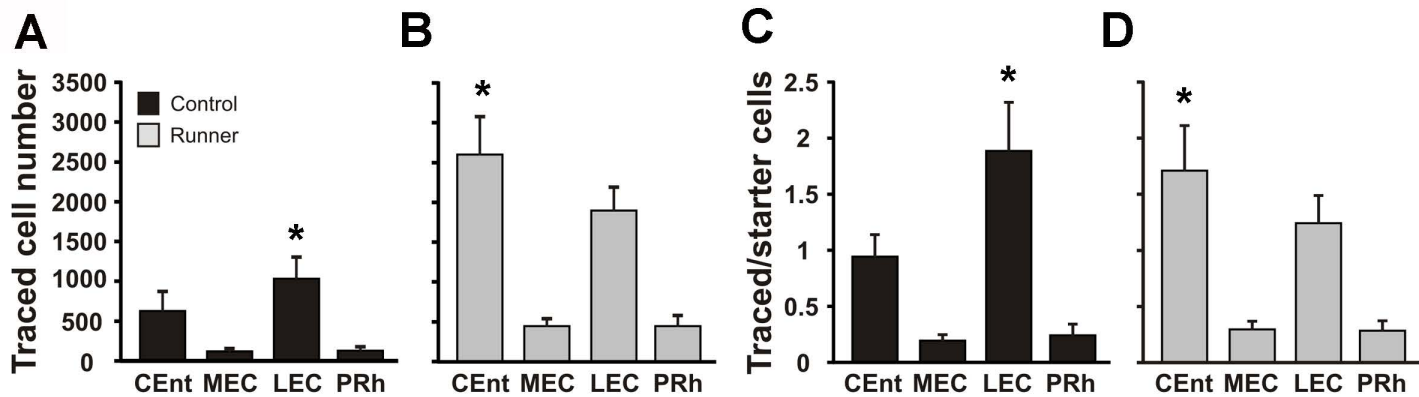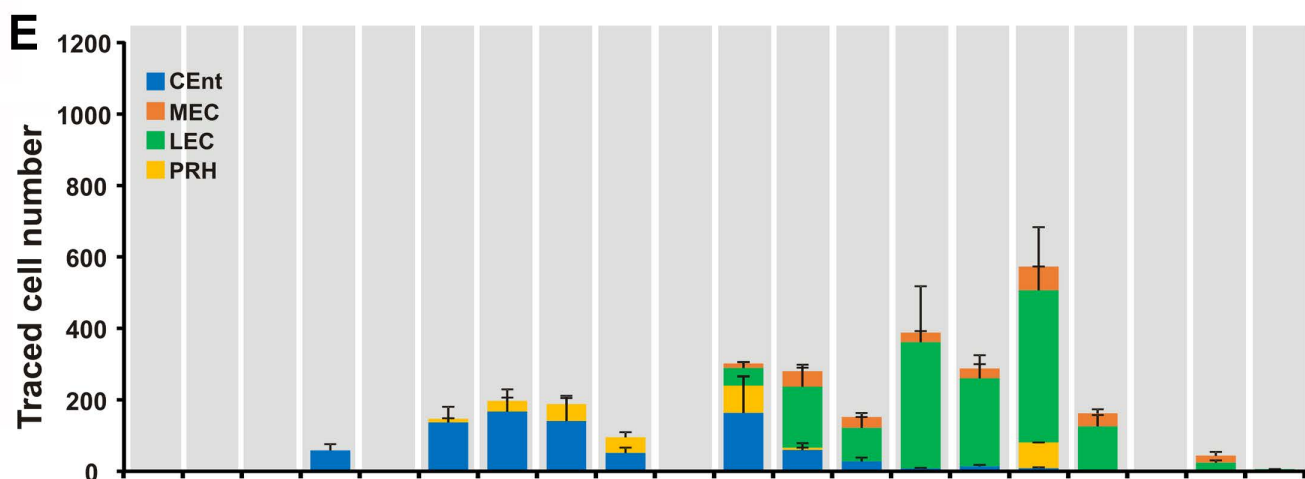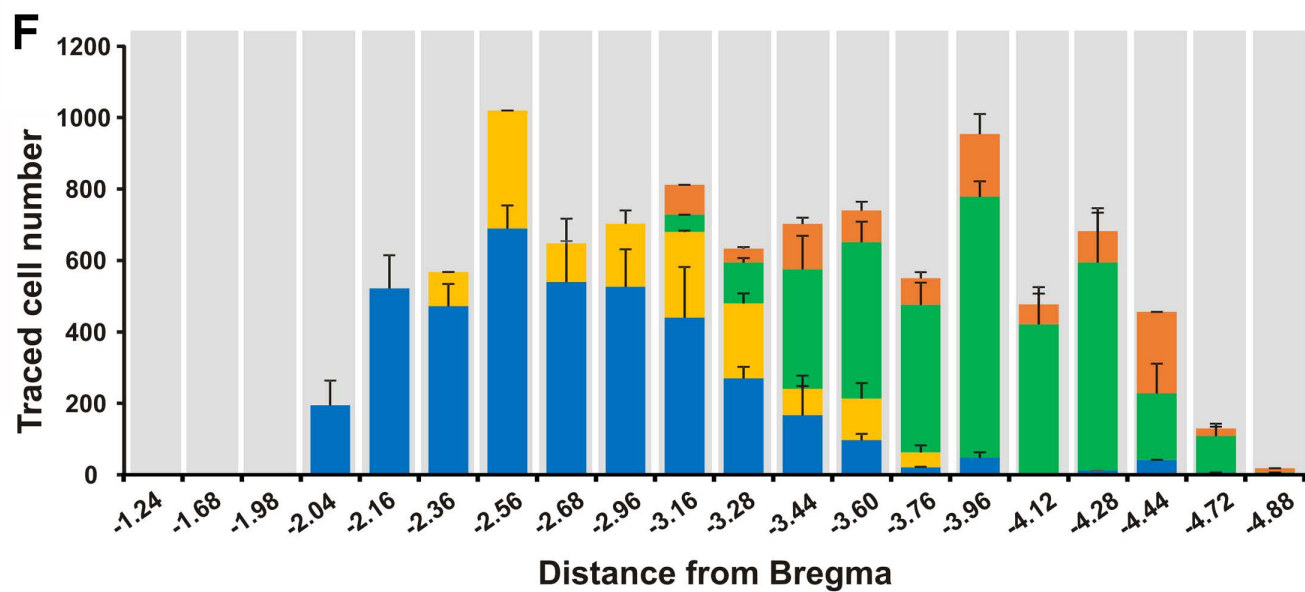

Supplement: NIHMS832838-supplement-Vivar_et_al__2016_Supplement.pdf [file NIHMS832838-supplement-Vivar_et_al__2016_Supplement.pdf]
